# Supplementary material
Source: publisher figshare collection journal article supplement (https://frontiersin.figshare.com/ndownloader/files/12571589)
Supplement: Supplementary file [file 12571589]

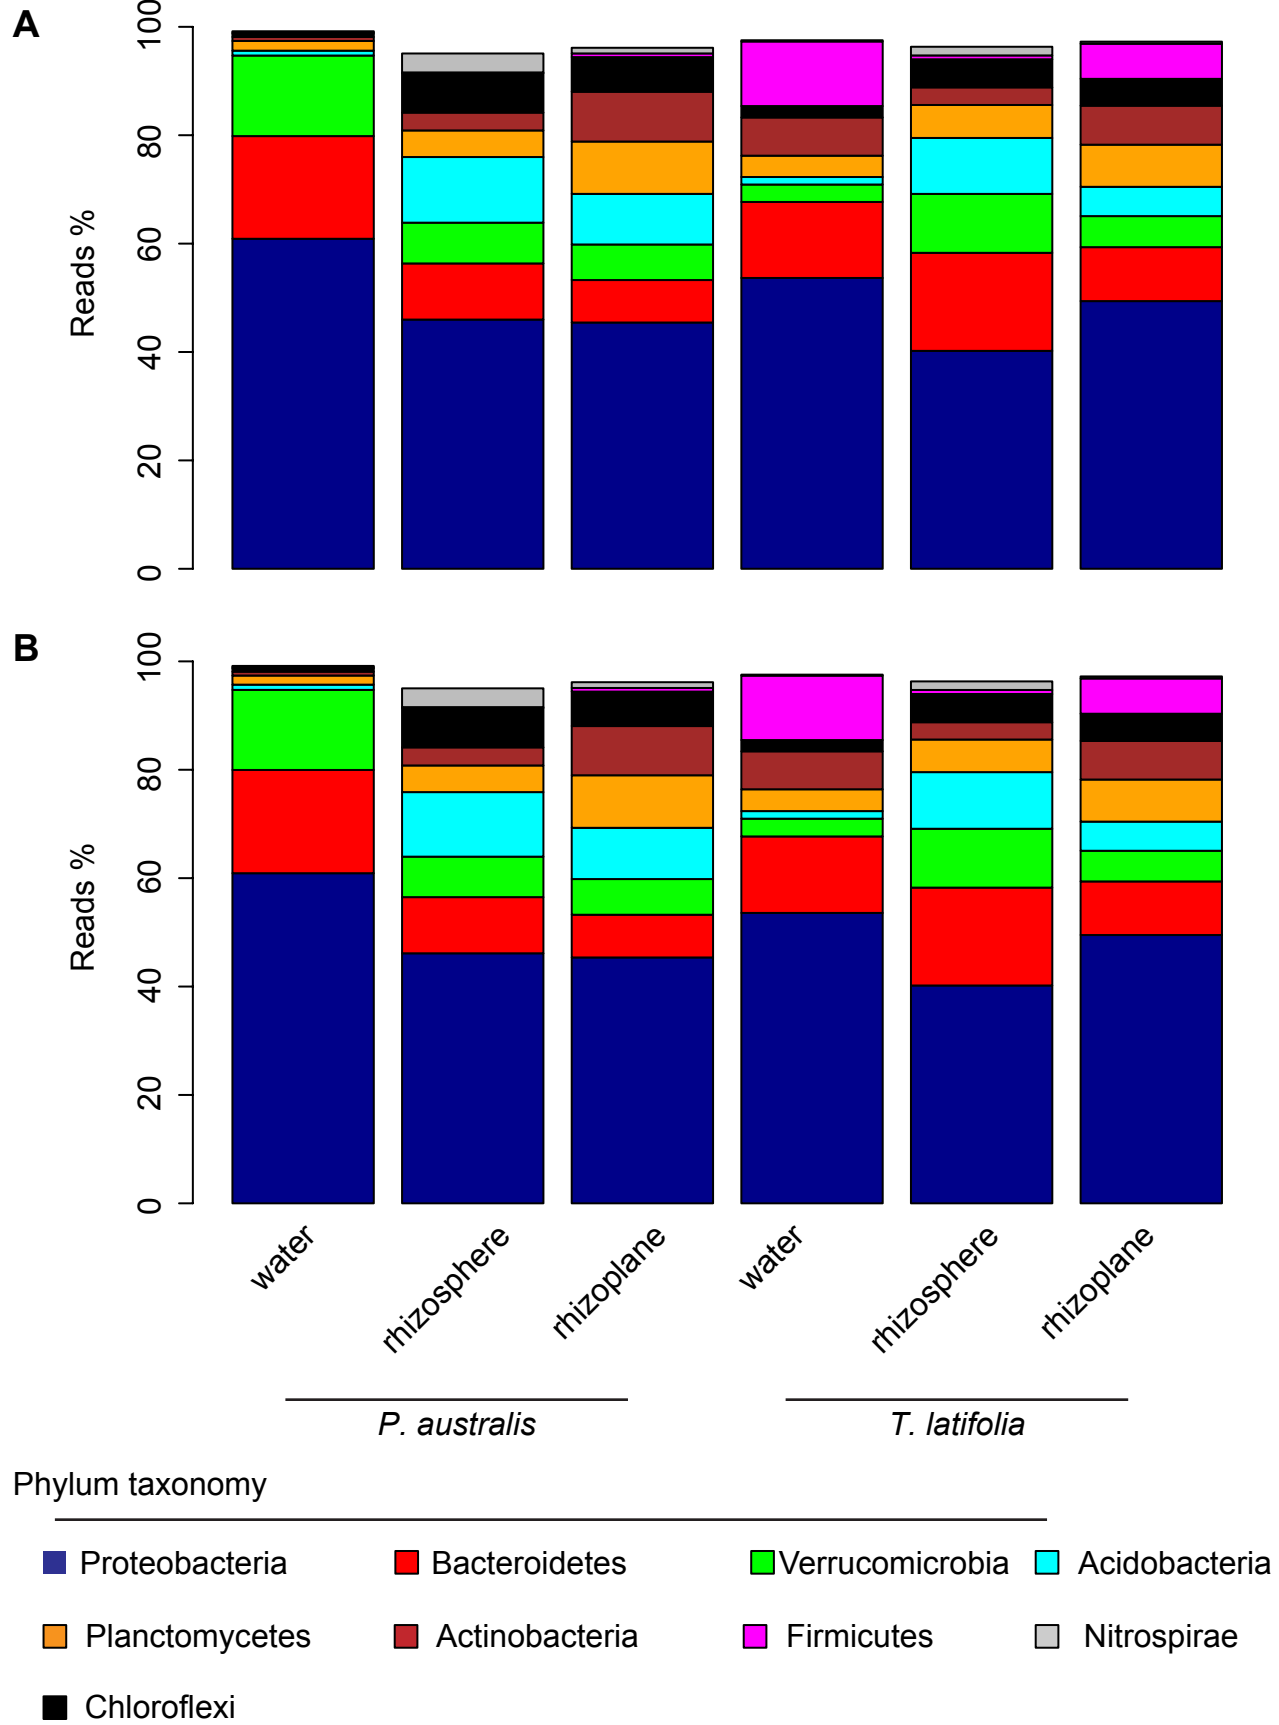

**Supplementary Figure 1.** Average relative abundace (% of sequencing reads) of the dominant phyla identified in the indicated microhabitats in either *P. australis* or *T. latifolia* in technical replicate set 1 (**A**) or set 2 (**B**), respectively. Only phyla with an average relative abundance of 1% included in the analysis.
